# Supplementary material
Source: PubMed Central journal article supplement (PMC2148342)

A

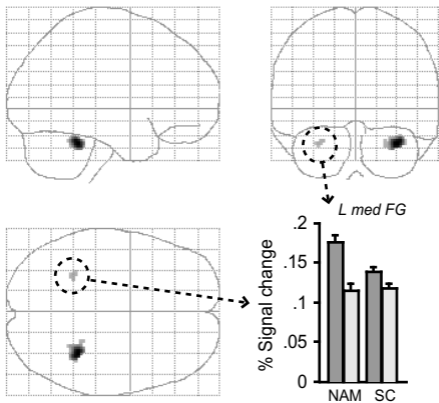

B

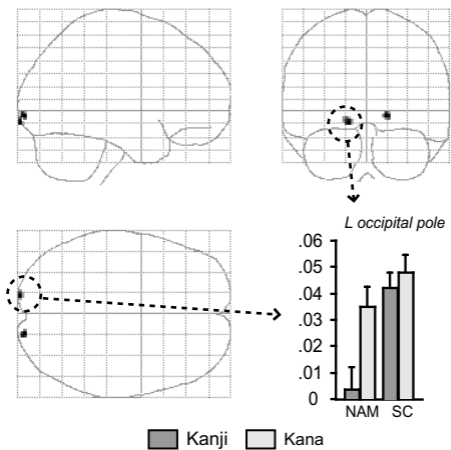

■ Kanji    □ Kana

Supplement: pnas_0704487104_1.pdf [file pnas_0704487104_1.pdf]
